# Supplementary material
Source: PubMed Central journal article supplement (PMC4313289)
Supplement: JCM.02164-14_zjm999093858so1.pdf [file JCM.02164-14_zjm999093858so1.pdf]

**Table S1.** Serotype *emm59* GAS strains collected in the United States. Epidemiology data and phylogenetic tree branches relative to Fig. 2 and 3 are shown for each strain. Strains denoted with the same superscript number have identical genomes. Strains denoted with a superscript character underwent follow-up epidemiology investigation. Strains MGAS26475-26541 were analyzed during the first rapid response exercise, and strains MGAS26544-26562 were analyzed during the second iteration. Key to characters:  $\alpha$ , live in or periodically visit the same community;  $\beta$ , live in the same community;  $\gamma$ , overlapping stay in a long-term care facility. Key to states: CA, California; CO, Colorado; MN, Minnesota; NM, New Mexico; OR, Oregon. Key to ethnicity: AS, Asian; B, Black; NA, Native American; Unk, Unknown; W, White.

| Strain<br>(MGAS) | Year | State | County | Race | Branch of<br>Phylogenetic |
|------------------|------|-------|--------|------|---------------------------|
|                  |      |       |        |      | Tree                      |
| 26475            | 2010 | CA    | A      | W    | singleton                 |
| 26476            | 2011 | MN    | B      | NA   | $h^{1,\alpha}$            |
| 26477            | 2011 | CO    | C      | W    | singleton                 |
| 26478            | 2011 | OR    | D      | AS   | a                         |
| 26479            | 2011 | NM    | E      | W    | a                         |
| 26480            | 2011 | MN    | F      | W    | e                         |
| 26481            | 2011 | MN    | F      | W    | f                         |
| 26482            | 2011 | MN    | B      | NA   | $h^{1,\alpha}$            |
| 26483            | 2011 | OR    | D      | W    | a                         |
| 26484            | 2011 | OR    | D      | W    | $a^2$                     |
| 26485            | 2011 | MN    | G      | W    | f                         |
| 26486            | 2011 | MN    | B      | NA   | $h^{1,\alpha}$            |

|       |      |    |   |     |                  |
|-------|------|----|---|-----|------------------|
| 26487 | 2011 | MN | H | Unk | c                |
| 26488 | 2011 | MN | I | W   | e                |
| 26489 | 2011 | MN | J | NA  | h <sup>1,α</sup> |
| 26490 | 2011 | MN | K | NA  | h                |
| 26491 | 2011 | MN | B | W   | h                |
| 26492 | 2011 | MN | I | W   | h                |
| 26493 | 2011 | MN | B | W   | h                |
| 26494 | 2011 | MN | B | W   | f                |
| 26495 | 2011 | MN | K | NA  | c                |
| 26496 | 2011 | OR | D | W   | b                |
| 26497 | 2011 | MN | J | AS  | f                |
| 26498 | 2011 | MN | L | W   | singleton        |
| 26499 | 2012 | MN | B | W   | h                |
| 26500 | 2012 | MN | B | W   | g <sup>3</sup>   |
| 26501 | 2011 | NM | M | NA  | d                |
| 26502 | 2012 | OR | N | W   | a <sup>2</sup>   |
| 26503 | 2012 | OR | D | W   | a                |
| 26504 | 2012 | MN | B | NA  | e                |
| 26505 | 2012 | MN | O | NA  | g                |
| 26506 | 2012 | MN | O | B   | g                |
| 26507 | 2012 | MN | K | NA  | f <sup>4,β</sup> |
| 26508 | 2012 | MN | B | NA  | g <sup>5</sup>   |
| 26509 | 2012 | MN | P | NA  | e                |
| 26510 | 2012 | MN | Q | NA  | g <sup>3</sup>   |
| 26511 | 2012 | MN | K | NA  | f <sup>4,β</sup> |
| 26512 | 2012 | MN | R | W   | h <sup>1</sup>   |
| 26513 | 2012 | MN | B | W   | g                |
| 26514 | 2012 | OR | D | Unk | a                |

|       |      |    |   |     |                |
|-------|------|----|---|-----|----------------|
| 26515 | 2012 | OR | D | W   | b              |
| 26516 | 2012 | NM | E | NA  | a              |
| 26517 | 2012 | NM | S | W   | e              |
| 26519 | 2012 | MN | B | NA  | g              |
| 26520 | 2012 | MN | T | NA  | f              |
| 26521 | 2012 | MN | B | NA  | e              |
| 26522 | 2012 | MN | B | B   | h              |
| 26523 | 2012 | MN | B | NA  | e              |
| 26524 | 2012 | MN | K | NA  | g              |
| 26525 | 2012 | MN | B | W   | g <sup>5</sup> |
| 26526 | 2012 | MN | B | W   | g              |
| 26527 | 2012 | OR | D | W   | a              |
| 26528 | 2012 | OR | D | Unk | b              |
| 26529 | 2012 | MN | B | NA  | e              |
| 26530 | 2012 | MN | U | W   | g              |
| 26531 | 2012 | MN | U | W   | f              |
| 26532 | 2012 | MN | B | Unk | f              |
| 26533 | 2012 | MN | B | NA  | h              |
| 26534 | 2012 | MN | B | NA  | h              |
| 26535 | 2012 | MN | B | W   | h              |
| 26536 | 2012 | MN | V | W   | f              |
| 26537 | 2012 | NM | W | NA  | d              |
| 26538 | 2012 | CO | X | W   | singleton      |
| 26539 | 2010 | MN | Y | W   | singleton      |
| 26540 | 2011 | NM | E | Unk | a              |
| 26541 | 2012 | CO | X | W   | singleton      |
| 26544 | 2013 | MN | B | Unk | e              |
| 26545 | 2013 | MN | B | NA  | h              |

|       |      |    |    |     |                |
|-------|------|----|----|-----|----------------|
| 26546 | 2013 | MN | B  | W   | h              |
| 26547 | 2013 | MN | U  | W   | e              |
| 26548 | 2013 | MN | Z  | Unk | e              |
| 26549 | 2013 | MN | B  | W   | g              |
| 26550 | 2013 | MN | B  | B   | h              |
| 26551 | 2013 | MN | B  | NA  | h              |
| 26552 | 2013 | MN | B  | W   | h              |
| 26553 | 2013 | MN | B  | W   | h              |
| 26554 | 2013 | MN | B  | W   | f              |
| 26555 | 2013 | MN | AA | W   | h              |
| 26556 | 2013 | MN | U  | W   | e <sup>y</sup> |
| 26557 | 2013 | MN | U  | W   | e <sup>y</sup> |
| 26558 | 2013 | MN | U  | W   | e              |
| 26559 | 2013 | MN | U  | W   | singleton      |
| 26560 | 2013 | MN | G  | NA  | e              |
| 26562 | 2013 | MN | B  | NA  | e              |
